# Supplementary material for: Gold Nanopeanuts as Prospective Support for Cisplatin in Glioblastoma Nano-Chemo-Radiotherapy
Source: PubMed Central journal article supplement (PMC7730046; doi:10.3390/ijms21239082), 2020-11-29
Supplement: ijms-21-09082-s001.pdf [file ijms-21-09082-s001.pdf]

Supplementary Materials:

# Gold Nanopeanuts as Prospective Support for Cisplatin in Glioblastoma Nano-Chemo-Radiotherapy

Joanna Depciuch <sup>1,\*</sup>, Justyna Miszczyk <sup>1</sup>, Alexey Maximenko <sup>1</sup>, Piotr M. Zielinski <sup>1</sup>, Kamila Rawojć <sup>2</sup>, Agnieszka Panek <sup>1</sup>, Pawel Olko <sup>1,†</sup> and Magdalena Parlinska-Wojtan <sup>1,†</sup>

<sup>1</sup> Institute of Nuclear Physics Polish Academy of Sciences, 31-342 Krakow, Poland; justyna.miszczyk@ifj.edu.pl (J.M.); alexey.a.maximenko@gmail.com (A.M.); piotr.m.zielinski@ifj.edu.pl (P.M.Z.); agnieszka.panek@ifj.edu.pl (A.P.); pawel.olko@ifj.edu.pl (P.O.); magdalena.parlinska@ifj.edu.pl (M.P.-W.)

<sup>2</sup> Department of Endocrinology, Nuclear Medicine Unit, The University Hospital, Krakow, Poland; k.rawojc@gmail.com

\* Correspondence: joanna.depciuch@ifj.edu.pl

† Equal contribution as senior authors.

## Chemical changes in the cells

In the Raman (Figure S1) and FTIR (Figure S2) spectra of all analyzed samples, peaks corresponding to functional groups building molecules of nucleic acid, polysaccharides, proteins and lipids functional groups, were observed. Moreover, the differences in the maximum absorbance values or Raman intensities, were visible, when we compare the investigated samples to the Ctrl. This observation shows the changes in the quantitative chemical compositions caused by Au NPes, cPt, cPt@Au NPes and X-ray irradiation. Furthermore, different positions of individual peaks in FTIR and Raman spectra depending on the sample, were noticed. The shifts of peaks suggest structural changes in the chemical compounds building functional groups. Moreover, their local chemical environments are different.

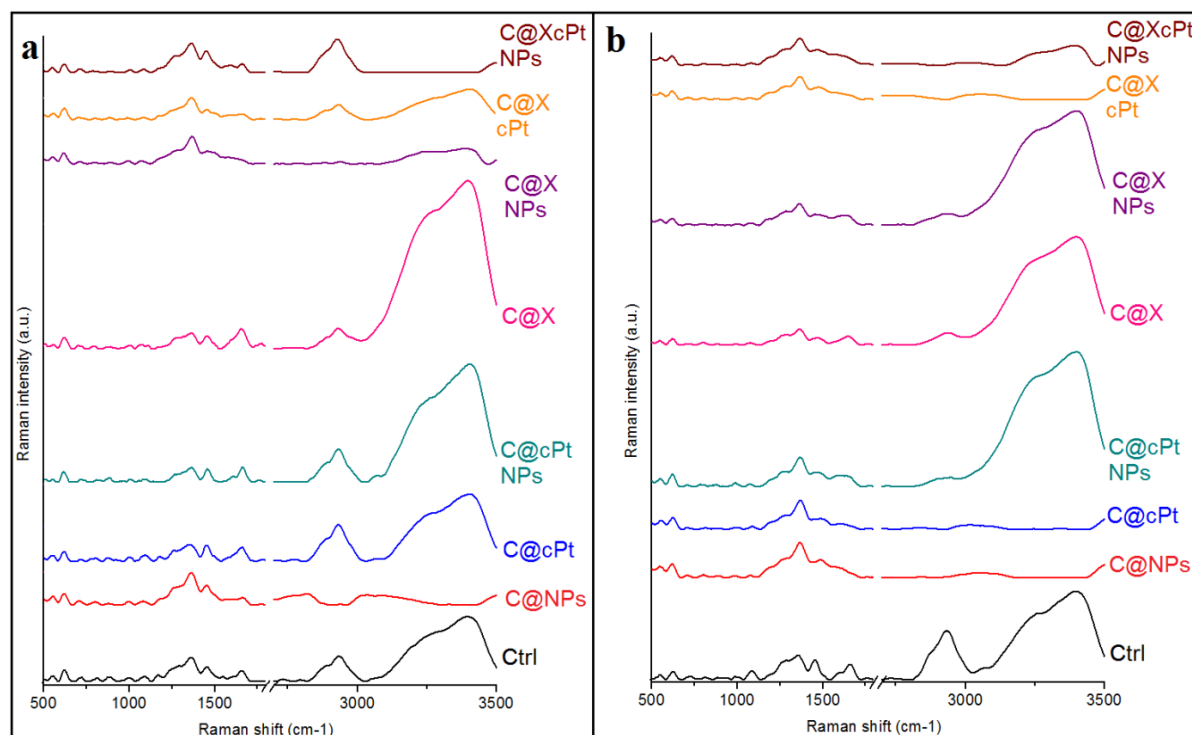

**Figure S1.** Raman spectra of U118 (a) and U251 (b) cells: Ctrl (black spectrum); C@NPs (red spectrum); C@cPt (blue spectrum); C@cPtNPs (green spectrum); C@X (pink spectrum); C@XNPs (violet spectrum); C@XcPt (orange spectrum); C@XcPtNPs (brown spectrum).

When we compare the investigated samples with the Ctrl, we observe significant changes in the structure of the chemical compounds, which are visible as shifts or absences of peaks. In the Raman spectrum of U118 C@NPs shifts of peaks corresponding to functional groups building glucose, lipids and amide I, as well as the absence of the peak at 1292  $\text{cm}^{-1}$ , were observed. Moreover, cPt addition to cell culture caused structural changes in the amides II and III and phenylalanine. In the Raman spectrum of U118 C@cPtNPs absence of peaks at 995  $\text{cm}^{-1}$ , 1089  $\text{cm}^{-1}$  and 1548  $\text{cm}^{-1}$ , as well as a shift of the peak originating from amide II vibrations, were visible. X-ray irradiation caused shifts of peaks corresponding to functional groups building glucose and amides II and III. Addition Au NPs to the U118 cells treated by X-ray radiation caused significant structural changes in all three amides and in glucose. In the Raman spectrum of U118 C@XcPt the absence of peak at 1292  $\text{cm}^{-1}$  and shifts of peaks originating from amide II and lipids vibrations were visible, while addition Au NPs to this system additionally caused structural changes in glucose. In the Raman spectrum of U251 C@NPs, absence of peaks corresponding to amide II and CH vibrations from lipids, as well as shifts of peaks at 1362  $\text{cm}^{-1}$ , 1455  $\text{cm}^{-1}$ , were observed. Addition Au NPs to the U251 cell culture caused structural changes in the amide II and lipids vibrations visible as peaks at 1292  $\text{cm}^{-1}$ , 1366  $\text{cm}^{-1}$ , 1461  $\text{cm}^{-1}$ , 2978  $\text{cm}^{-1}$ , respectively. Cisplatin immobilized on the Au NPs surface caused, in the U251 cells, shifts of peaks corresponding to amides and lipids vibrations. In the Raman spectrum of U251 C@X absence of the peak at 1548  $\text{cm}^{-1}$  and shifts of peaks at 988  $\text{cm}^{-1}$ , 1350  $\text{cm}^{-1}$ , 3324  $\text{cm}^{-1}$ , were observed. Structural changes in all three amides vibrations, as well as in phenylalanine and lipids, were noticed in the Raman spectra of U251 C@XNPs, U251 C@XcPt and U251 C@XcPtNPs.

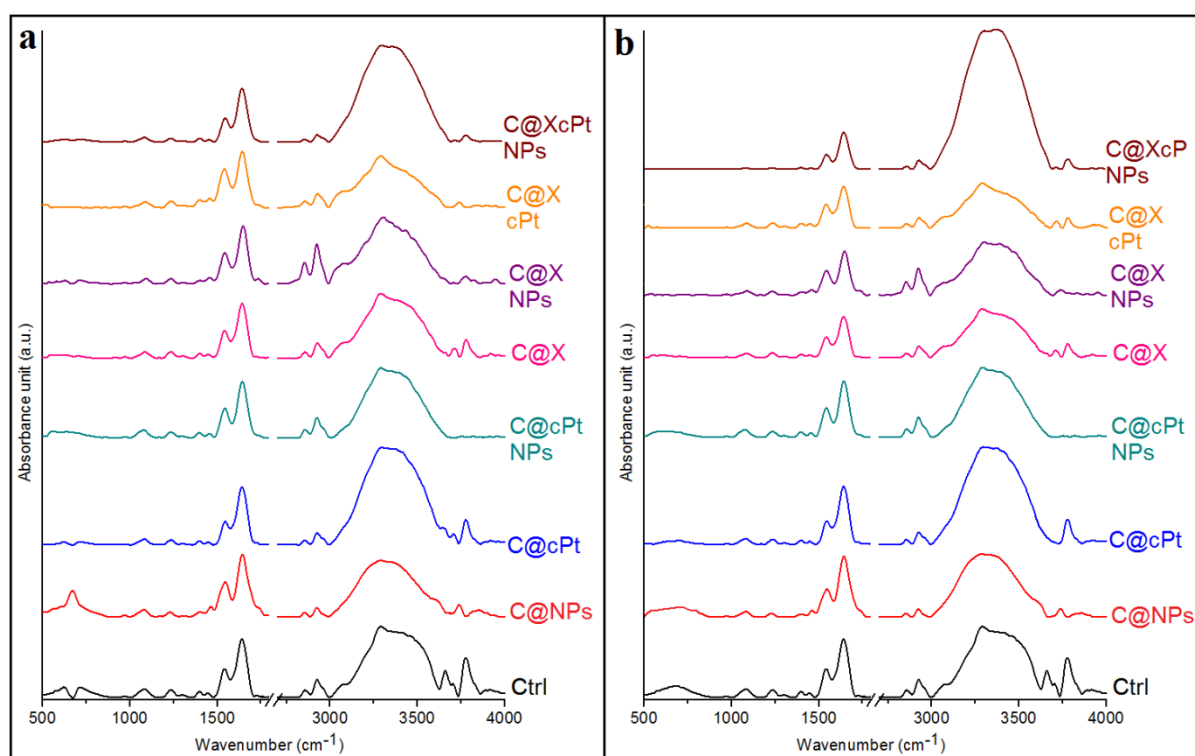

**Figure S2.** FTIR spectra of U118 (a) and U251 (b) cells: Ctrl (black spectrum); C@NPs (red spectrum); C@cPt (blue spectrum); C@cPtNPs (green spectrum); C@X (pink spectrum); C@XNPs (violet spectrum); C@XcPt (orange spectrum); C@XcPtNPs (brown spectrum).

The investigated samples were compared with the respective Ctrl. In the FTIR spectra of U118 C@NPs significant shifts of peaks at 1228  $\text{cm}^{-1}$  and 1790  $\text{cm}^{-1}$  were observed. Moreover, shifts of peaks corresponding to amide II and C=O vibrations, were visible in the FTIR spectrum of U118 C@cPt, while in the spectrum of U118 C@cPtNPs only a shift of the peak at 1745  $\text{cm}^{-1}$  was noticed. Furthermore, X-ray radiation with Au NPs in U118 cells caused structural changes in the glycogen, lipids and proteins, while X-ray radiation of cells with cPt is responsible for the shifts of peaks

originating from functional groups building glycogen and lipids structure. In the FTIR spectrum of U118 C@XcPtNPs absence of the peak at 1735  $\text{cm}^{-1}$  and shifts of the peaks at 1452  $\text{cm}^{-1}$  and 1546  $\text{cm}^{-1}$  were observed. In the cells only irradiated by X-rays, no changes in the peak positions were noticed. In the case of U251 cells cultured with Au NPs, shifts of the peaks corresponding to amides I and II,  $\text{CH}_2$  and  $\text{C}=\text{O}$  groups from lipids, were visible, while cells cultured with cPt caused shifts of peaks originating from amide II and  $\text{C}=\text{O}$  group of lipids. In the FTIR spectrum of U251 C@cPtNPs, structural changes in glycol and lipids, were noticed, while in U251 C@XNPs changes in these chemical compounds and amide I, were observed. Cisplatin added to cells (C@cPt) subsequently irradiated by X-ray caused a shift of the peak corresponding to the  $\text{C}=\text{O}$  group from lipids, however, the addition of Au NPs to this sample caused changes in the nucleic acid (absence of peak at 971  $\text{cm}^{-1}$ ), lipids (absence of peaks at 1446  $\text{cm}^{-1}$  and 1770  $\text{cm}^{-1}$ ) and proteins (shift of peak at 1540  $\text{cm}^{-1}$ ). The identified peaks for all the obtained FTIR and Raman spectra are presented in detail in Table 1.

Apart from DNA damage, cisplatin induces reactive oxygen species (ROS), which trigger cell death.<sup>1</sup> ROS have unpaired electrons therefore they are very reactive and act in response to proper functioning of biological macromolecules such as carbohydrates, lipids and proteins.<sup>2</sup> Moreover, the proteins are the major targets for biological oxidants. Therefore, oxidant formation is the major consequence of protein damage.<sup>3</sup> Moreover, as potential cytotoxic mechanisms of NPs, influence on the structure and functioning of cell membranes, metabolic process disorders by the formation of reactive oxygen species and negative effects on enzyme activity and DNA synthesis, are indicated.<sup>4</sup> The effect of NPs and cisplatin are visible in the Raman (Fig. 1) and FTIR (Fig. 2) spectra as absences or shifts of protein peaks. Moreover, cisplatin caused an increase of lipid peroxidation, which destroys the proper functioning of the cell membrane.<sup>5</sup> The changes in the lipids structure were also observed in the Raman and FTIR spectra.

X-rays are commonly used in anticancer therapies causing damaging of the DNA [6]. Moreover, it is known, that radiosensitization supported by gold nanoparticles is more effective, than X-ray therapy alone.<sup>7</sup> In this study, X-ray irradiation supported by Au NPs caused more visible structural changes in the cells, especially in the proteins, lipids and DNA, than X-ray irradiation alone. Furthermore, the most noticeable chemical changes are observed in the cell lines cultured with cPt@Au NPs and X-ray irradiated, which can be the synergistic effect of these two factors.

To resolve, whether it is sufficient to detect only the differences between the studied glioblastoma cell lines: U118 (Fig. 3a) and U251 (Fig. 3b), which were cultured with Au NPs, cPt or cPt@Au NPs and X-ray irradiated, PCA was used to analyze the obtained Raman and FTIR spectra.

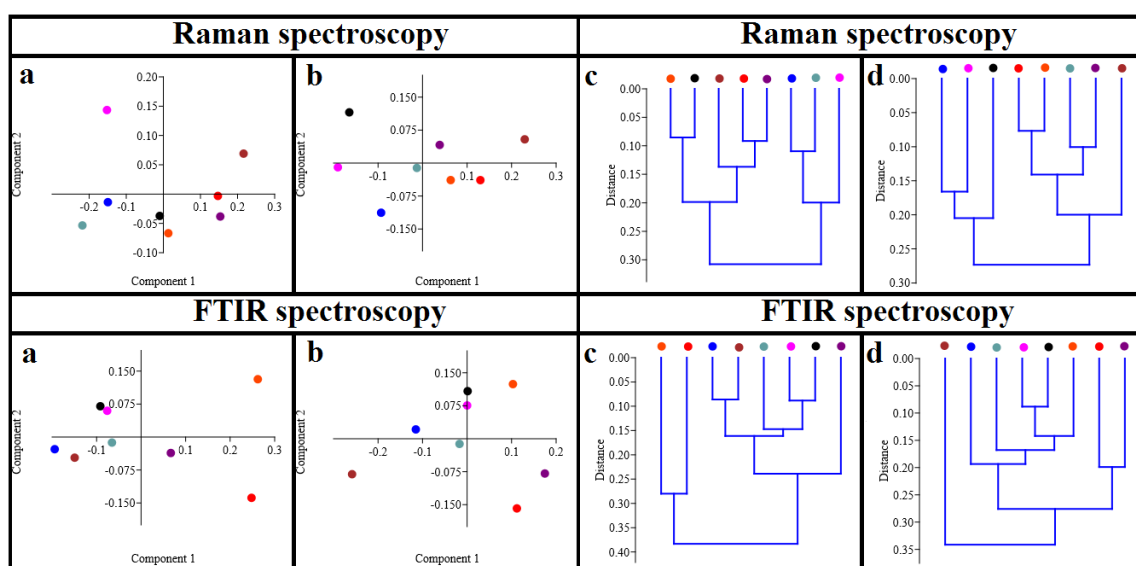

**Figure S3.** PCA analysis (a, b) and HCA analysis (c, d) of Raman and FTIR spectra of U118 (a, c) and U251 (b, d) cells: Ctrl (black dot); C@NPs (red dot); C@cPt (blue dot); C@cPtNPs (green dot); C@X (pink dot); C@XNPs (violet dot); C@XcPt (orange dot); C@XcPtNPs (brown dot).

The Raman PCA plot showed no separation of the control U118 cell lines and cells cultured with cPt and cPt@Au NPs, while in the case of the U251 cells, separation of other samples, was observed. Consequently, it can be concluded that the U251 cells could be more sensitive to the effects of drugs, X-rays and nanoparticles, as we showed in our previously research [7]. However, PCA analysis obtained from the FTIR spectra showed, that it is not possible to distinguish between the FTIR spectra of two analyzed control cell lines and cells treated by X-ray radiation. Moreover, the results obtained from the FTIR data are very similar when we compare the PCA analysis for U118 and U251 cell lines.

Cluster analysis performed from Raman and FTIR measurements (Fig. 3c, d) shows two main groups in the case of the U251 cell line (Raman data) and three in the U251 cell lines (FTIR data) and U118 (both Raman and FTIR data). However, depending on the method, the components in these groups are different. The most significant similarities between the control sample of U118 (Raman data) were observed for U118 C@XcPt. Moreover, similarities between U118 C@cPt and U118 C@cPtNPs, and between U118 C@NPs and U118 C@XNPs were observed. For the U251 cell lines, Raman similarities between C@cPt and C@X and between C@NPs and C@XcPt and between C@cPtNPs and C@XNPs, were noticed. It is very interesting that for HCA analysis obtained from the FTIR data, similarities between the control and the C@X samples for both U118 and U251 cell lines, were visible. Moreover, for U118 cell similarities between C@NPs and C@XcPt and between C@cPt and C@XcPtNPs, were noticed. FTIR spectroscopy showed similarities in the U251 cells between samples cultured with NPs and non-treated by X-ray.

**Table S1.** FTIR and Raman peaks positions in the analyzed samples with description of vibrations corresponding to the respective functional groups [1-14].

| Raman spectroscopy |      |       |      |       |      |          |      |      |      |        |      |        |      |           |      |                                                                                     |
|--------------------|------|-------|------|-------|------|----------|------|------|------|--------|------|--------|------|-----------|------|-------------------------------------------------------------------------------------|
| Ctrl               |      | C@NPs |      | C@cPt |      | C@cPtNPs |      | C@X  |      | C@XNPs |      | C@XcPt |      | C@XcPtNPs |      | Vibrations                                                                          |
| U118               | U251 | U118  | U251 | U118  | U251 | U118     | U251 | U118 | U251 | U118   | U251 | U118   | U251 | U118      | U251 |                                                                                     |
| 879                | 873  | 888   | 880  | 875   | 879  | 886      | 877  | 875  | 870  | 885    | 871  | 885    | 871  | 886       | 880  | C-H in-plane bending mode [8]                                                       |
| 995                | 988  | 993   | 985  | 1005  | 990  | -        | 985  | 998  | 1000 | 992    | 1005 | 991    | -    | 1006      | 997  | C-H in-plane bending mode of phenylalanine [8]                                      |
| 1089               | 1082 | 1080  | 1073 | 1091  | 1082 | -        | 1081 | 1107 | 1084 | 1074   | 1078 | 1084   | 1073 | 1084      | 1086 | Glucose [9], Triglycerides[10], C-C (lipid) [10]                                    |
| 71292              | 1262 | -     | 1267 | 1262  | 1275 | 1268     | 1279 | 1279 | 1273 | -      | 1277 | -      | 1292 | -         | 1265 | Amide III [11]                                                                      |
| 1362               | 1350 | 1362  | 1367 | 1354  | 1366 | 1365     | 1369 | 1366 | 1364 | 1368   | 1361 | 1363   | 1366 | 1362      | 1364 | CH <sub>3</sub> /CH <sub>2</sub> twisting or bending mode of lipid/collagen [12,13] |
| 1455               | 1449 | 1451  | 1483 | 1451  | 1461 | 1456     | 1459 | 1451 | 1456 | 1456   | 1458 | 1453   | 1472 | 1452      | 1453 | Fatty acids [9], CH <sub>2</sub> (lipids and proteins [14]                          |
| 1548               | 1577 | 1567  | -    | 1580  | 1550 | -        | 1549 | 1577 | -    | 1578   | -    | 1557   | 1555 | 1592      | -    | Amide II [11]                                                                       |
| 1655               | 1654 | 1662  | 1665 | 1661  | 1665 | 1661     | 1644 | 1653 | 1650 | 1668   | 1644 | 1659   | 1654 | 1659      | 1654 | Amide I [11]                                                                        |
| 2934               | 2933 | 2936  | -    | 2931  | 2978 | 2932     | 2938 | 2930 | 2938 | 2939   | 2926 | 2932   | 2897 | 2927      | 2978 | CH band of lipids [11]                                                              |
| 3397               | 3324 | 3329  | 3041 | 3404  | 3548 | 3405     | 3402 | 3397 | 3400 | 3393   | 3404 | 3406   | 3533 | 3537      | 3399 | CH from cholesterol and cholesterol ester [14]                                      |
| FTIR spectroscopy  |      |       |      |       |      |          |      |      |      |        |      |        |      |           |      |                                                                                     |
| Ctrl               |      | C@NPs |      | C@cPt |      | C@cPtNPs |      | C@X  |      | C@XNPs |      | C@XcPt |      | C@XcPtNPs |      | Vibrations                                                                          |
| U118               | U251 | U118  | U251 | U118  | U251 | U118     | U251 | U118 | U251 | U118   | U251 | U118   | U251 | U118      | U251 |                                                                                     |
| 970                | 971  | 970   | 971  | 972   | 972  | 971      | 970  | 971  | 973  | 970    | 969  | 971    | 971  | 972       | -    | PO <sub>3</sub> <sup>2-</sup> group from DNA, RNA and phospholipids [15]            |
| 1083               | 1084 | 1082  | 1083 | 1082  | 1083 | 1079     | 1079 | 1086 | 1081 | 1092   | 1089 | 1088   | 1086 | 1083      | 1083 | C-O group from glycogen [16]                                                        |
| 1235               | 1235 | 1228  | 1227 | 1235  | 1235 | 1235     | 1234 | 1235 | 1236 | 1233   | 1234 | 1236   | 1236 | 1234      | 1234 | Amide III [17]                                                                      |
| 1399               | 1399 | 1399  | 1397 | 1399  | 1399 | 1399     | 1399 | 1400 | 1400 | 1401   | 1399 | 1400   | 1400 | 1399      | 1399 | CH <sub>2</sub> group from protein and Lipids [18,19]                               |
| 1446               | 1446 | 1462  | 1462 | 1448  | 1448 | 1455     | 1454 | 1448 | 1448 | 1457   | 1458 | 1456   | 1449 | 1452      | -    | CH <sub>2</sub> group from cholesterol [19]                                         |
| 1540               | 1540 | 1544  | 1546 | 1546  | 1545 | 1543     | 1543 | 1543 | 1544 | 1544   | 1544 | 1540   | 1542 | 1546      | 1546 | Amide II [17]                                                                       |
| 1641               | 1641 | 1644  | 1643 | 1642  | 1644 | 1643     | 1643 | 1642 | 1645 | 1648   | 1647 | 1643   | 1642 | 1642      | 1642 | Amide I [17]                                                                        |

|      |      |      |      |      |      |      |      |      |      |      |      |      |      |      |      |                                                          |
|------|------|------|------|------|------|------|------|------|------|------|------|------|------|------|------|----------------------------------------------------------|
| 1765 | 1770 | 1790 | 1792 | 1756 | 1756 | 1745 | 1762 | 1765 | 1769 | 1735 | 1734 | 1742 | 1725 | -    | -    | C=O group from lipids [19]                               |
| 2856 | 2856 | 2853 | 2853 | 2855 | 2854 | 2857 | 2857 | 2855 | 2855 | 2853 | 2854 | 2854 | 2855 | 2855 | 2855 | Symmetric stretching vibrations of CH <sub>2</sub> [19]  |
| 2925 | 2926 | 2924 | 2923 | 2926 | 2928 | 2924 | 2926 | 2927 | 2928 | 2924 | 2924 | 2927 | 2927 | 2926 | 2926 | Asymmetric stretching vibrations of CH <sub>2</sub> [19] |
| 3291 | 3291 | 3290 | 3286 | 3295 | 3291 | 3291 | 3295 | 3290 | 3292 | 3305 | 3302 | 3289 | 3290 | 3297 | 3369 | OH from water [16]                                       |

## References

1. Vitetta, L.; Linnane, A.W. Endocellular regulation of free radicals and hydrogen peroxide: key determinants of the inflammatory response. *Inflammopharmacology* **2014**, *22*, 69-72.
2. Ahmad, S.; Khan, H.; Shahab, U.; Rehman, S.; Rafi, Z.; Khan, M.Y.; Ansari, A.; Siddiqui, Z.; Ashaf, J.M.; Abdullah, S.M.S.; Habib, S.; Uddin, M. Protein oxidation: an overview of metabolism of Sulphur containing amino acid, cysteine. *Front. Biosci. (Schol. Ed.)* **2017**, *9*, 71-87.
3. Bystrzejewska-Piotrowska, G.; Golimowski, J.; Urban, P.L. Nanoparticles: their potential toxicity, waste and environmental management. *Waste Manag.* **2009**, *29*, 2587-2595.
4. Desoize, B. Cancer and metals and metal compounds: part I – carcinogenesis. *Crit. Rev. Oncol. Hematol.* **2002**, *42*, 1-3.
5. Harrison, L.B.; Chadha, M.; Hill, R.J.; Hu, K.; Shasha, D. Impact of tumor hypoxia and anemia on radiation therapy outcomes. *The Oncologist* **2002**, *7*, 492-508.
6. Ross, R.D.; Cole, L.E.; Tilley, J.M.R.; Roeder, R.K. Effects of functionalized gold nanoparticle size on X-ray attenuation and substrate binding affinity. *Chem. Mater.* **2014**, *26*, 1187-1194.
7. Bogdali-Suslik, A.M.; Rawojć, K.; Miszczyk, J.; Panek, A.; Woźniak, M.; Szewczyk, K.; Książek, T.; Bik-Multanowski, M.; Swakoń, J.; Komenda, W.; Mojżeszek, N.; Kajdrowicz, N.; Kopeć, R.; Olko, P. Influence of therapeutic proton beam on glioblastoma multiforme proliferation index – a preliminary study. *Acta Phys. Pol. A* **2020**, 137.
8. Chan, J.W.; Taylor, D.S.; Zwerdling, T.; Lane, S.M.; Ihara, K.; Huser, T. Micro-Raman spectroscopy detects individual neoplastic and normal hematopoietic cells. *Biophys. J.* **2006**, *90*, 648–656.
9. Krafft, C.; Neudert, L.; Simat, T.; Salzer, R. Near infrared Raman spectra of human brain lipids. *Spectrochim. Acta A Mol. Biomol. Spectrosc.* **2005**, *61*, 1529–1535.
10. Silveira Jr, L.; Sathaiyah, S.; Zangaro, R.A.; Pacheco, M.T.; Chavantes, M.C.; Pasqualucci, C.A. Correlation between near-infrared Raman spectroscopy and the histopathological analysis of atherosclerosis in human coronary arteries. *Lasers Surg. Med.* **2002**, *30*, 290–297.
11. Stone, N.; Kendall, C.; Smith, J.; Crow, P.; Barr, H. Raman spectroscopy for identification of cancers. *Faraday Discuss.* **2004**, *126*, 141–157.
12. Huang, Z.; McWilliams, A.; Lui, H.; McLean, D.I.; Lam, S.; Zeng, H. Near-infrared Raman spectroscopy for optical diagnosis of lung cancer. *Int. J. Cancer* **2003**, *107*, 1047–1052.
13. Malini, R.; Venkatakrisna, K.; Kurien, J.; Pai, K.M.; Rao, L.; Kartha, V.B.; Krishna, C.M. Discrimination of normal, inflammatory, premalignant, and malignant oral tissue: a Raman spectroscopy study. *Biopolymers* **2006**, *81*, 179–193.
14. Stremersch, S.; Marro, M.; Pinchasik, B.E.; Baatsen, P.; Hendrix, A.; De Smedt, S.C.; Loza-Alvarez, P.; Skirtach, A.G.; Raemdonck, K.; Braeckmans, K. Identification of individual exosome-like vesicle by surface enhanced Raman spectroscopy. *Small* **2016**, *12*, 3292–3301.
15. Maziak, D.E.; Do, M.T.; Shamji, F.M.; Sundaresan, S.R.; Perkins, D.G.; Wong, P.T. Fourier-transform infrared spectroscopic study of characteristic molecular structure in cancer cells of esophagus: an exploratory study. *Cancer Detect Prev.* **2007**, *31*, 244–253.
16. Krishna, C.M.; Sockalingum, G.D.; Bhat, R.A.; Venteo, L.; Kushtagi, P.; Pluot, M.; Manfait, M. FTIR and Raman microspectroscopy of normal, benign, and malignant formalin-fixed ovarian tissues. *Anal Bioanal Chem.* **2007**, *387*, 1649–1656.
17. Movasaghi, Z.; Rehman, S.; ur Rehman, I. Fourier transform infrared (FTIR) spectroscopy of biological tissues. *Appl. Spectrosc. Rev.* **2008**, *43*, 134–179.
18. Elmi, F.; Movaghar, A.F.; Elmi, M.M.; Alinezhad, H.; Nikbakhsh, N. Application of FT-IR spectroscopy on breast cancer serum analysis. *Spectrochim Acta A Mol Biomol Spectrosc.* **2017**, *187*, 87–91.
19. Yano, K.; Ohoskima, S.; Gotou, Y.; Kumaido, K.; Moriguchi, T.; Katayama, H. Direct measurement of human lung cancerous and noncancerous tissues by fourier transform infrared microscopy: can an infrared microscope be used as a clinical tool? *Anal Biochem.* **2000**, *287*, 218–225.
